# Supplementary material
Source: MDPI journal article supplement (https://www.mdpi.com/2076-3417/12/20/10253)
Supplement: s1 [file s1]

**Tabel S1.** Absorbance data for different tested water flow rates and disc rotational speeds, using Al<sub>2</sub>O<sub>3</sub>, within a SD experimental setup

| <i>Water flow rate (L/h), Disc rotational speed (rpm)</i>   |       |       |       |       |       |       |       |       |       |       |       |       |       |
|-------------------------------------------------------------|-------|-------|-------|-------|-------|-------|-------|-------|-------|-------|-------|-------|-------|
| <i>2 g/L Al<sub>2</sub>O<sub>3</sub>, 5.76 L/h, 100 rpm</i> |       |       |       |       |       |       |       |       |       |       |       |       |       |
| <i>Time, t(min)</i>                                         | 0     | 5     | 10    | 15    | 20    | 25    | 30    | 35    | 40    | 45    | 50    | 55    | 60    |
| <i>Absorbance, A<sub>456</sub></i>                          | 0.562 | 0.599 | 0.659 | 0.612 | 0.585 | 0.573 | 0.582 | 0.585 | 0.565 | 0.561 | 0.662 | 0.557 | 0.549 |
| <i>2 g/L Al<sub>2</sub>O<sub>3</sub>, 5.76 L/h, 250 rpm</i> |       |       |       |       |       |       |       |       |       |       |       |       |       |
| <i>t (min)</i>                                              | 0     | 5     | 10    | 15    | 20    |       |       |       |       |       |       |       |       |
| <i>A<sub>456</sub></i>                                      | 0.557 | 0.561 | 0.561 | 0.556 | 0.564 |       |       |       |       |       |       |       |       |
| <i>2 g/L Al<sub>2</sub>O<sub>3</sub>, 7.44 L/h, 500 rpm</i> |       |       |       |       |       |       |       |       |       |       |       |       |       |
| <i>t (min)</i>                                              | 0     | 5     | 10    | 15    |       |       |       |       |       |       |       |       |       |
| <i>A<sub>456</sub></i>                                      | 0.562 | 0.557 | 0.572 | 0.586 |       |       |       |       |       |       |       |       |       |
| <i>2 g/L Al<sub>2</sub>O<sub>3</sub>, 7.44 L/h, 800 rpm</i> |       |       |       |       |       |       |       |       |       |       |       |       |       |
| <i>t (min)</i>                                              | 0     | 5     | 10    | 15    | 20    | 25    | 30    | 35    |       |       |       |       |       |
| <i>A<sub>456</sub></i>                                      | 0.586 | 0.561 | 0.552 | 0.540 | 0.544 | 0.534 | 0.544 | 0.545 |       |       |       |       |       |
| <i>2 g/L Al<sub>2</sub>O<sub>3</sub>, 8.16 L/h, 100 rpm</i> |       |       |       |       |       |       |       |       |       |       |       |       |       |
| <i>t (min)</i>                                              | 0     | 5     | 10    | 15    | 20    | 25    |       |       |       |       |       |       |       |
| <i>A<sub>456</sub></i>                                      | 0.545 | 0.552 | 0.536 | 0.517 | 0.528 | 0.518 |       |       |       |       |       |       |       |
| <i>4 g/L Al<sub>2</sub>O<sub>3</sub>, 5.76 L/h, 100 rpm</i> |       |       |       |       |       |       |       |       |       |       |       |       |       |
| <i>t (min)</i>                                              | 0     | 5     | 10    | 15    |       |       |       |       |       |       |       |       |       |
| <i>A<sub>456</sub></i>                                      | 0.217 | 0.204 | 0.227 | 0.323 |       |       |       |       |       |       |       |       |       |
| <i>4 g/L Al<sub>2</sub>O<sub>3</sub>, 5.76 L/h, 250 rpm</i> |       |       |       |       |       |       |       |       |       |       |       |       |       |
| <i>t (min)</i>                                              | 0     | 5     | 10    | 15    |       |       |       |       |       |       |       |       |       |
| <i>A<sub>456</sub></i>                                      | 0.209 | 0.229 | 0.217 | 0.290 |       |       |       |       |       |       |       |       |       |
| <i>4 g/L Al<sub>2</sub>O<sub>3</sub>, 5.76 L/h, 500 rpm</i> |       |       |       |       |       |       |       |       |       |       |       |       |       |
| <i>t (min)</i>                                              | 0     | 5     | 10    | 15    | 20    | 25    |       |       |       |       |       |       |       |
| <i>A<sub>456</sub></i>                                      | 0.223 | 0.223 | 0.217 | 0.214 | 0.223 | 0.209 |       |       |       |       |       |       |       |
| <i>4 g/L Al<sub>2</sub>O<sub>3</sub>, 5.76 L/h, 800 rpm</i> |       |       |       |       |       |       |       |       |       |       |       |       |       |
| <i>t (min)</i>                                              | 0     | 5     | 10    | 15    | 20    | 25    | 30    |       |       |       |       |       |       |
| <i>A<sub>456</sub></i>                                      | 0.250 | 0.245 | 0.239 | 0.248 | 0.250 | 0.246 | 0.223 |       |       |       |       |       |       |
| <i>4 g/L Al<sub>2</sub>O<sub>3</sub>, 7.44 L/h, 100 rpm</i> |       |       |       |       |       |       |       |       |       |       |       |       |       |
| <i>t (min)</i>                                              | 0     | 5     | 10    | 15    | 20    | 25    | 30    |       |       |       |       |       |       |
| <i>A<sub>456</sub></i>                                      | 0.321 | 0.321 | 0.306 | 0.298 | 0.297 | 0.295 | 0.298 |       |       |       |       |       |       |
| <i>4g/L Al<sub>2</sub>O<sub>3</sub>, 7.44 L/h, 250 rpm</i>  |       |       |       |       |       |       |       |       |       |       |       |       |       |
| <i>t (min)</i>                                              | 0     | 7     | 17    | 20    | 25    | 30    | 33    |       |       |       |       |       |       |
| <i>A<sub>456</sub></i>                                      | 0.298 | 0.296 | 0.286 | 0.279 | 0.290 | 0.294 | 0.281 |       |       |       |       |       |       |
| <i>4 g/L Al<sub>2</sub>O<sub>3</sub>, 7.44 L/h, 500 rpm</i> |       |       |       |       |       |       |       |       |       |       |       |       |       |
| <i>t (min)</i>                                              | 0     | 5     | 10    | 15    | 20    | 25    |       |       |       |       |       |       |       |
| <i>A<sub>456</sub></i>                                      | 0.275 | 0.287 | 0.274 | 0.285 | 0.259 | 0.263 |       |       |       |       |       |       |       |
| <i>4 g/L Al<sub>2</sub>O<sub>3</sub>, 7.44 L/h, 800 rpm</i> |       |       |       |       |       |       |       |       |       |       |       |       |       |
| <i>t (min)</i>                                              | 0     | 5     | 10    | 15    |       |       |       |       |       |       |       |       |       |
| <i>A<sub>456</sub></i>                                      | 0.263 | 0.258 | 0.250 | 0.251 |       |       |       |       |       |       |       |       |       |
| <i>4 g/L Al<sub>2</sub>O<sub>3</sub>, 8.16 L/h, 100 rpm</i> |       |       |       |       |       |       |       |       |       |       |       |       |       |
| <i>t (min)</i>                                              | 0     | 5     | 10    | 15    | 20    | 25    | 30    |       |       |       |       |       |       |

|                                                             |       |       |       |       |       |       |       |  |  |  |  |  |  |
|-------------------------------------------------------------|-------|-------|-------|-------|-------|-------|-------|--|--|--|--|--|--|
| $A_{456}$                                                   | 0.374 | 0.384 | 0.384 | 0.399 | 0.373 | 0.373 | 0.354 |  |  |  |  |  |  |
| <i>4 g/L Al<sub>2</sub>O<sub>3</sub>, 8.16 L/h, 800 rpm</i> |       |       |       |       |       |       |       |  |  |  |  |  |  |
| <i>t (min)</i>                                              | 0     | 5     | 10    | 15    | 20    | 25    |       |  |  |  |  |  |  |
| $A_{456}$                                                   | 0.464 | 0.439 | 0.461 | 0.430 | 0.443 | 0.444 |       |  |  |  |  |  |  |
